# Supplementary material for: Poly(3-butylthiophene) nanowires inducing crystallization of poly(3-hexylthiophene) for enhanced photovoltaic performance
Source: Royal Society of Chemistry journal article supplement (doi:10.1039/c4tc02470b), 2014-11-24
Supplement: c4tc02470b1.pdf [file c4tc02470b1.pdf]

## Supporting Information

### Poly(3-butylthiophene) Nanowires Inducing Crystallization of Poly(3-hexylthiophene) for Enhanced Photovoltaic Performance

Lin Zhang<sup>1</sup>, Weihua Zhou<sup>\*1,2</sup>, Jiangman Shi<sup>1</sup>, Ting Hu<sup>1</sup>, Xiaotian Hu<sup>1</sup>, Yong Zhang<sup>1</sup>,  
Yiwang Chen<sup>1,2</sup>

<sup>1</sup>School of Materials Science and Engineering/Institute of Polymers, Nanchang University, 999 Xuefu Avenue, Nanchang 330031, China; <sup>2</sup>Jiangxi Provincial Key Laboratory of New Energy Chemistry, College of Chemistry, Nanchang University, 999 Xuefu Avenue, Nanchang 330031, China

**Table S1.** The composition of the ternary blend solution.

| P3BT-nw<br>content<br>(wt%) | PCBM<br>(40 mg/mL) | P3HT<br>(40 mg/mL) | P3BT-nw<br>(2 mg/mL; 10 mg/mL) | ODCB     |
|-----------------------------|--------------------|--------------------|--------------------------------|----------|
| 0                           | 0.2 mL             | 0.2 mL             | 0                              | 0.400 mL |
| 3                           | 0.2 mL             | 0.194 mL           | 2 mg/mL, 0.12 mL               | 0.286 mL |
| 7                           | 0.2 mL             | 0.186 mL           | 2 mg/mL, 0.28 mL               | 0.134 mL |
| 10                          | 0.2 mL             | 0.180 mL           | 2 mg/mL, 0.40 mL               | 0.020 mL |
| 25                          | 0.2 mL             | 0.150 mL           | 10 mg/mL, 0.20 mL              | 0.250 mL |
| 50                          | 0.2 mL             | 0.100 mL           | 10 mg/mL, 0.40 mL              | 0.100 mL |

\* Corresponding author. Tel.: +86 791 83969562; fax: +86 791 83969561. E-mail address: zhouweihua@ncu.edu.cn (W. Zhou).

The DSC samples were prepared by the followed steps. First, the P3HT solution (10 mg/mL) and P3BT-nw suspension (1 mg/mL; 10 mg/mL) were prepared in ODCB in bottles. Second, the P3HT solution and P3BT-nw suspension of different volume were mixed as illustrated in **Table S2**. Finally, the samples were dried in vacuum prior to the DSC analysis.

**Table S2.** The composition of the P3HT:P3BT-nw blends using for the DSC measurement.

| P3BT-nw content<br>(wt%) | P3HT<br>(10 mg/mL) | P3BT-nw<br>(1 mg/mL; 10 mg/mL) | ODCB     |
|--------------------------|--------------------|--------------------------------|----------|
| 0                        | 0.5 mL             | 0                              | 0.50 mL  |
| 3                        | 0.5 mL             | 1 mg/mL, 0.15 mL               | 0.35 mL  |
| 7                        | 0.5 mL             | 1 mg/mL, 0.35 mL               | 0.15 mL  |
| 10                       | 0.5 mL             | 1 mg/mL, 0.50 mL               | 0 mL     |
| 25                       | 0.5 mL             | 10 mg/mL, 0.125 mL             | 0.375 mL |
| 50                       | 0.5 mL             | 10 mg/mL, 0.25 mL              | 0.25 mL  |
| 100                      | 0 mL               | 10 mg/mL, 0.50 mL              | 0.50 mL  |

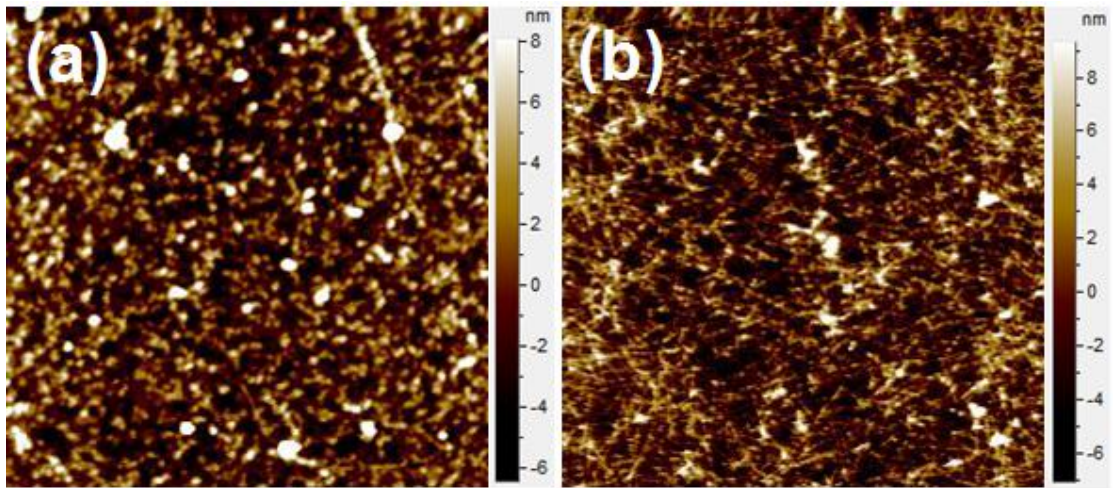

**Figure S1.** AFM topography images ( $5 \times 5 \mu\text{m}$ ) of P3BT film (a, b) and P3BT-nw film (c, d), respectively.

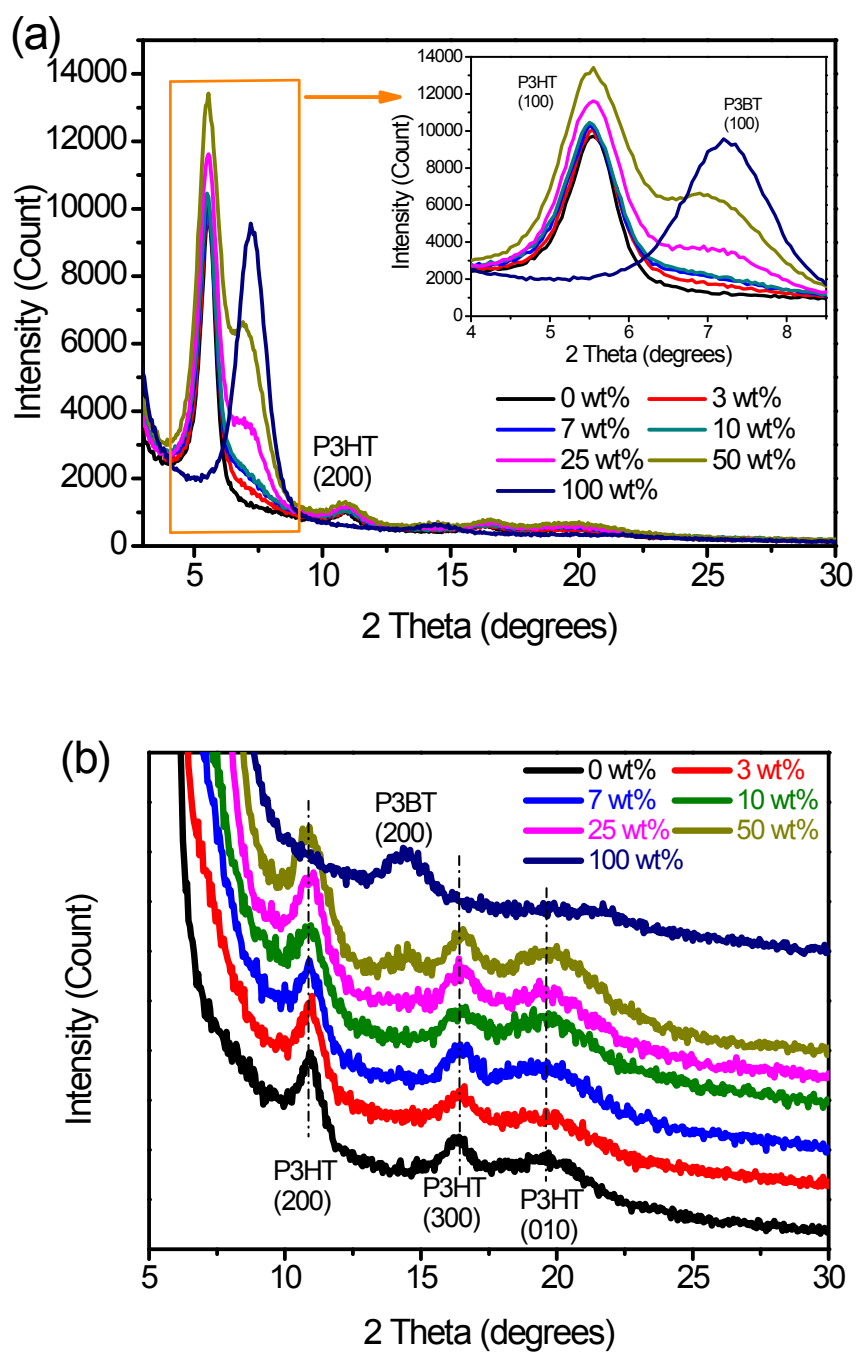

**Figure S2.** GIXRD (a) and enlarged GIXRD (b) of P3HT:P3BT-nw blends at different weight percentage of P3BT-nw.

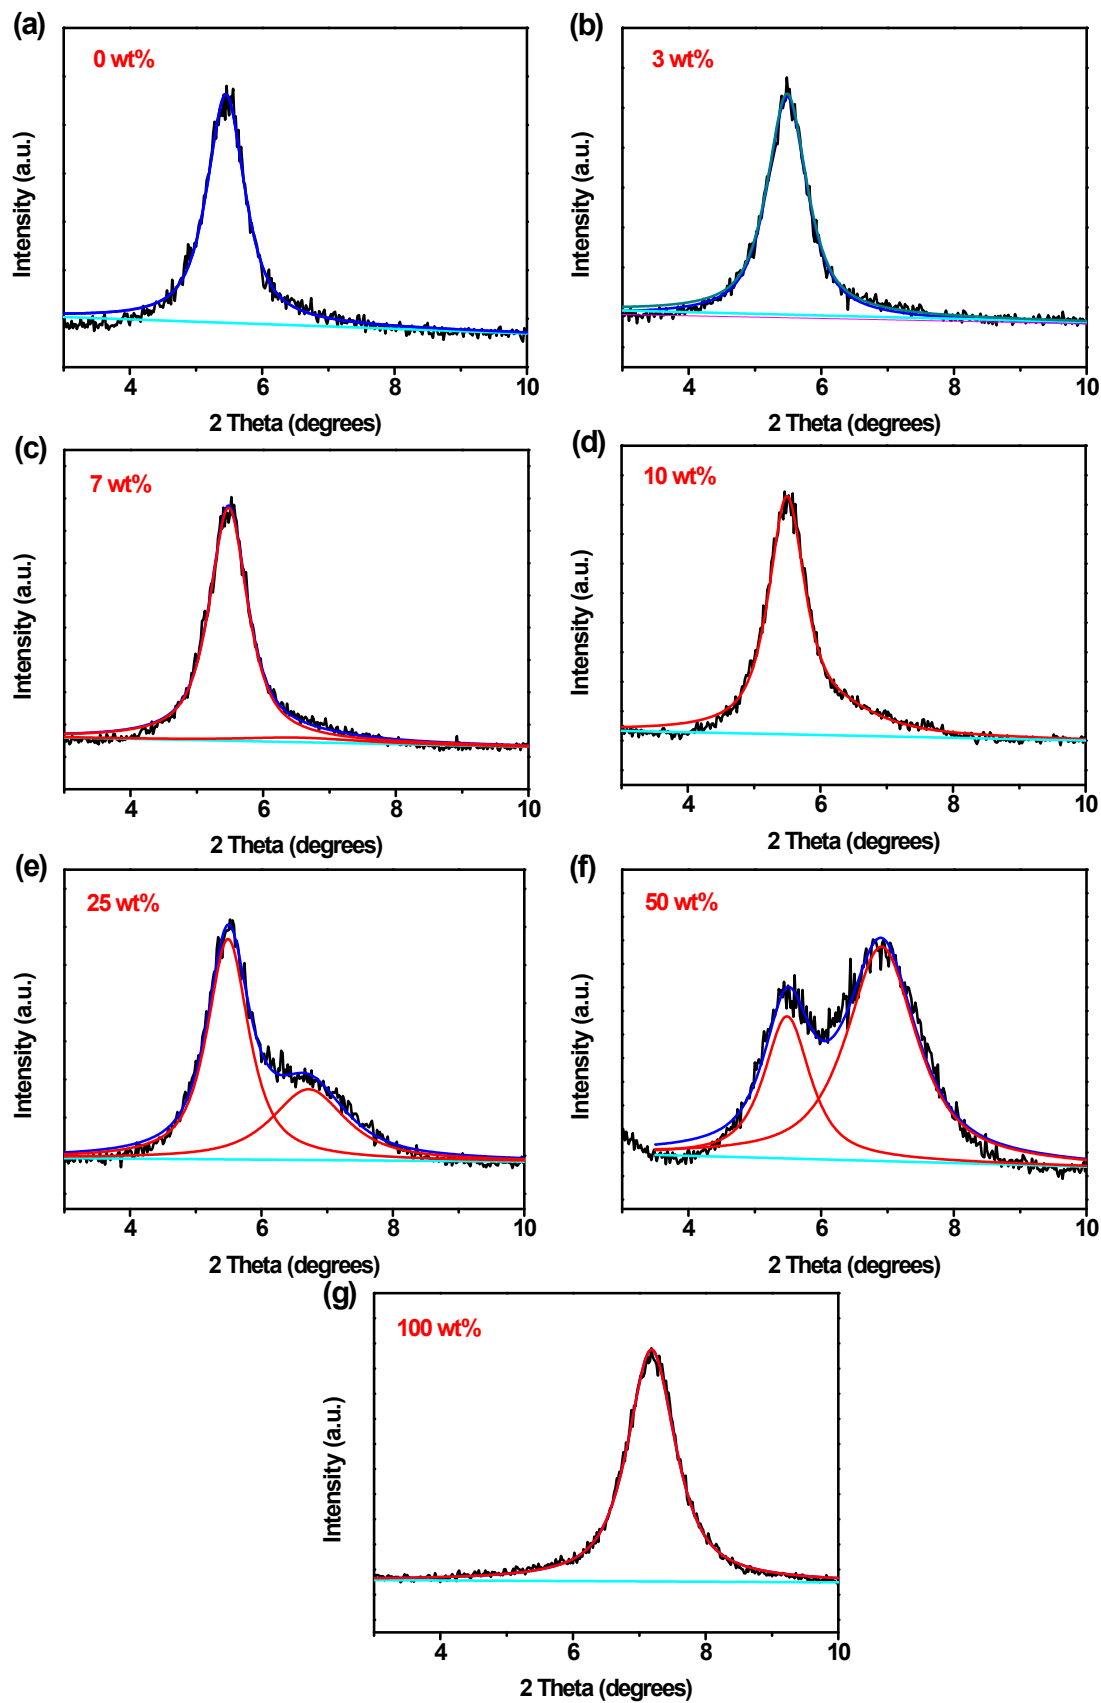

**Figure S3.** Fitted peaks of XRD of P3HT:P3BT-nw blends at different weight percentage of P3BT-nw.

**Table S3.** Parameters of P3HT:P3BT-nw blends at different weight percentage of P3BT-nw by fitting XRD diffraction peaks.

| P3BT content                      | 0 wt% | 3 wt% | 7 wt% | 10 wt% | 25 wt% | 50 wt% | 100 wt% |
|-----------------------------------|-------|-------|-------|--------|--------|--------|---------|
| $2\theta^1(^{\circ})$             | 5.46  | 5.48  | 5.48  | 5.50   | 5.50   | 5.50   |         |
| $d_{\text{lamella}}^1(\text{nm})$ | 1.617 | 1.611 | 1.611 | 1.605  | 1.605  | 1.605  |         |
| FWHM <sup>1</sup> (nm)            | 0.69  | 0.70  | 0.71  | 0.73   | 0.75   | 0.83   |         |
| CCL <sup>1</sup> (nm)             | 9.10  | 8.97  | 8.85  | 8.60   | 8.37   | 7.57   |         |
| Area <sup>1</sup>                 | 472.2 | 562.0 | 753.9 | 762.6  | 639.8  | 366.8  |         |
| $2\theta^2(^{\circ})$             |       |       |       |        | 6.72   | 6.92   | 7.18    |
| $d_{\text{lamella}}^2(\text{nm})$ |       |       |       |        | 1.314  | 1.276  | 1.230   |
| FWHM <sup>2</sup> (nm)            |       |       |       |        | 1.34   | 1.25   | 0.86    |
| CCL <sup>2</sup> (nm)             |       |       |       |        | 4.69   | 5.02   | 7.30    |
| Area <sup>2</sup>                 |       |       |       |        | 365.4  | 835.0  | 1172    |

<sup>1</sup> P3HT.

<sup>2</sup> P3BT.

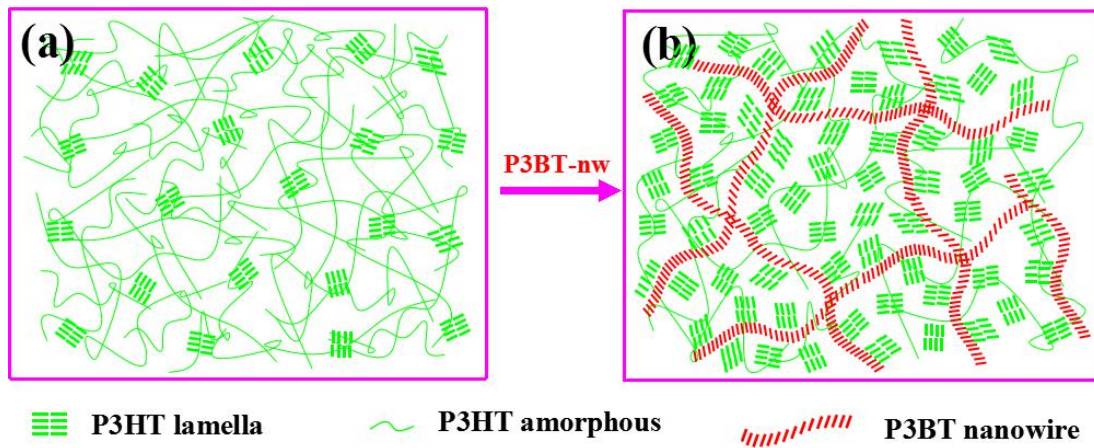

**Figure S4.** Schematic illustration of the morphology of (a) P3HT and (b) P3HT:P3BT-nw binary blend films.

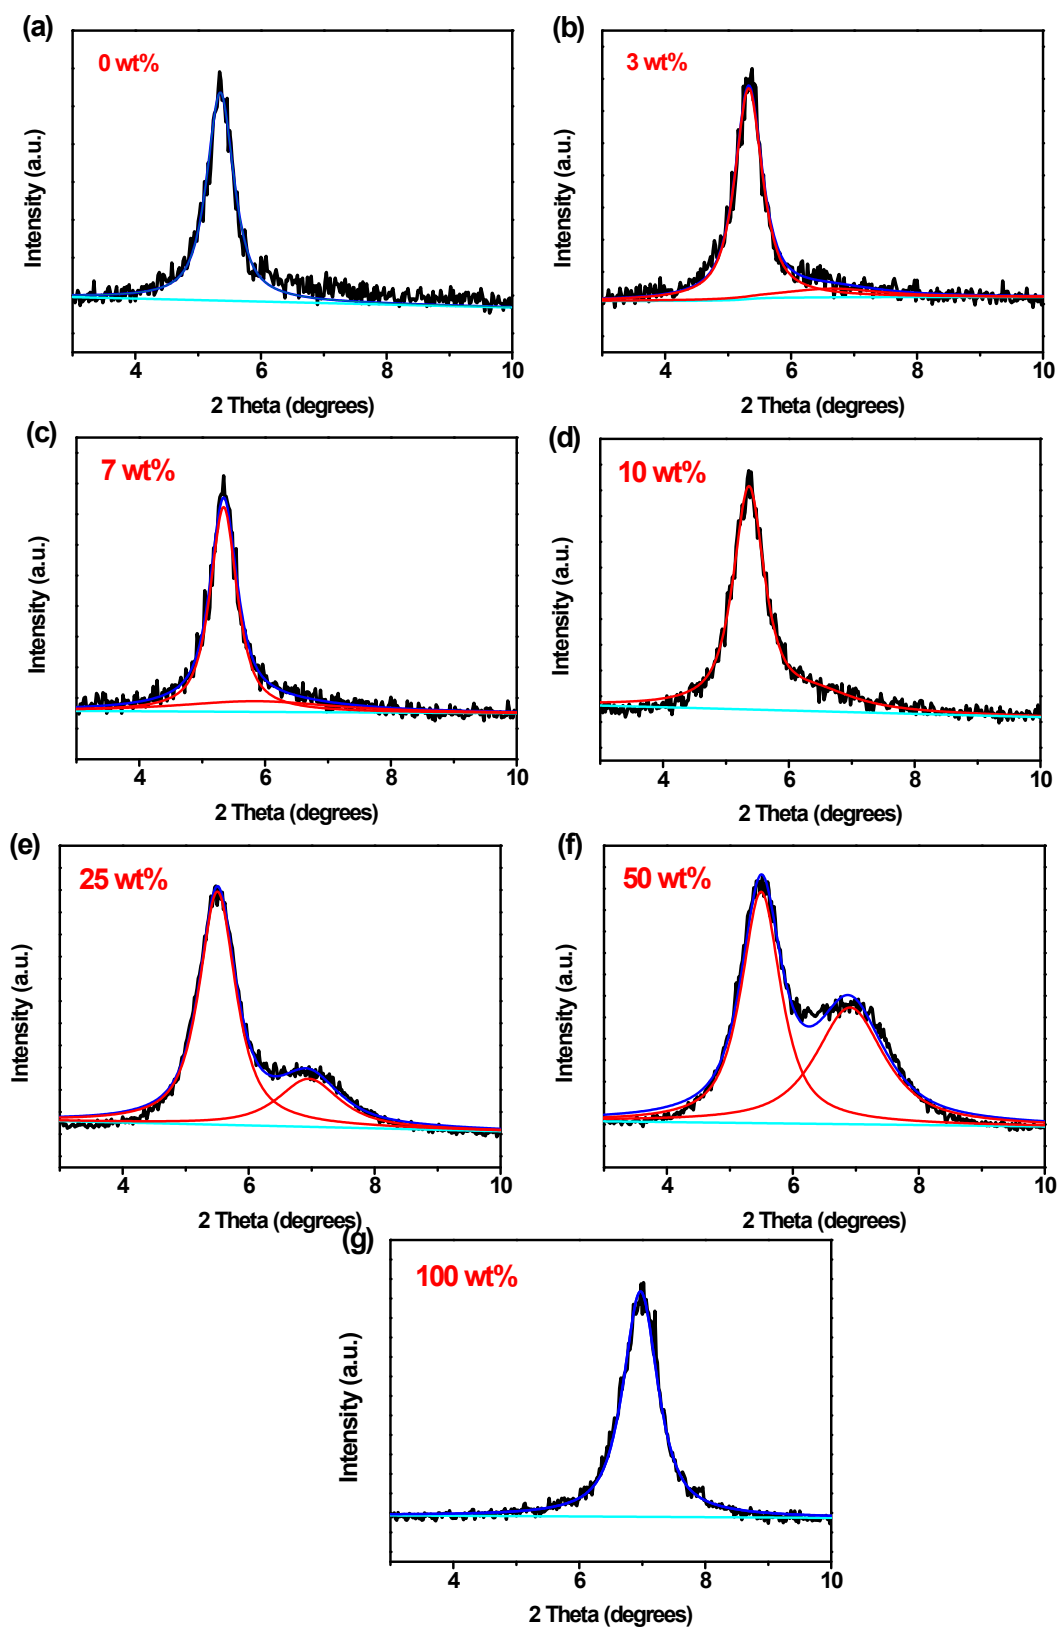

**Figure S5.** Fitted peaks of XRD of P3HT:P3BT-nw:PCBM blends at different weight percentage of P3BT-nw.



**Table S4.** Parameters of P3HT:P3BT-nw:PCBM blends at different weight percentage of P3BT-nw by fitting XRD diffraction peaks.

| P3BT content                     | 0 wt% | 3 wt% | 7 wt% | 10 wt% | 25 wt% | 50 wt% | 100 wt% |
|----------------------------------|-------|-------|-------|--------|--------|--------|---------|
| $2\theta_1(^{\circ})$            | 5.34  | 5.34  | 5.34  | 5.36   | 5.50   | 5.50   |         |
| $d_{\text{lamella1}}(\text{nm})$ | 1.653 | 1.653 | 1.653 | 1.647  | 1.605  | 1.605  |         |
| $\text{FWHM}_1(\text{nm})$       | 0.51  | 0.51  | 0.52  | 0.59   | 0.69   | 0.75   |         |
| $\text{CCL}_1(\text{nm})$        | 12.3  | 12.3  | 12.1  | 10.6   | 9.10   | 8.37   |         |
| $\text{Area}_1$                  | 418.5 | 514.9 | 542.0 | 737.7  | 1070   | 1188   |         |
| $2\theta_2(^{\circ})$            |       |       |       |        | 6.96   | 6.96   | 6.98    |
| $d_{\text{lamella2}}(\text{nm})$ |       |       |       |        | 1.269  | 1.269  | 1.265   |
| $\text{FWHM}_2(\text{nm})$       |       |       |       |        | 1.16   | 1.30   | 0.66    |
| $\text{CCL}_2(\text{nm})$        |       |       |       |        | 5.41   | 4.83   | 9.52    |
| $\text{Area}_2$                  |       |       |       |        | 368.9  | 1042   | 1116    |

<sup>1</sup> P3HT.

<sup>2</sup> P3BT.

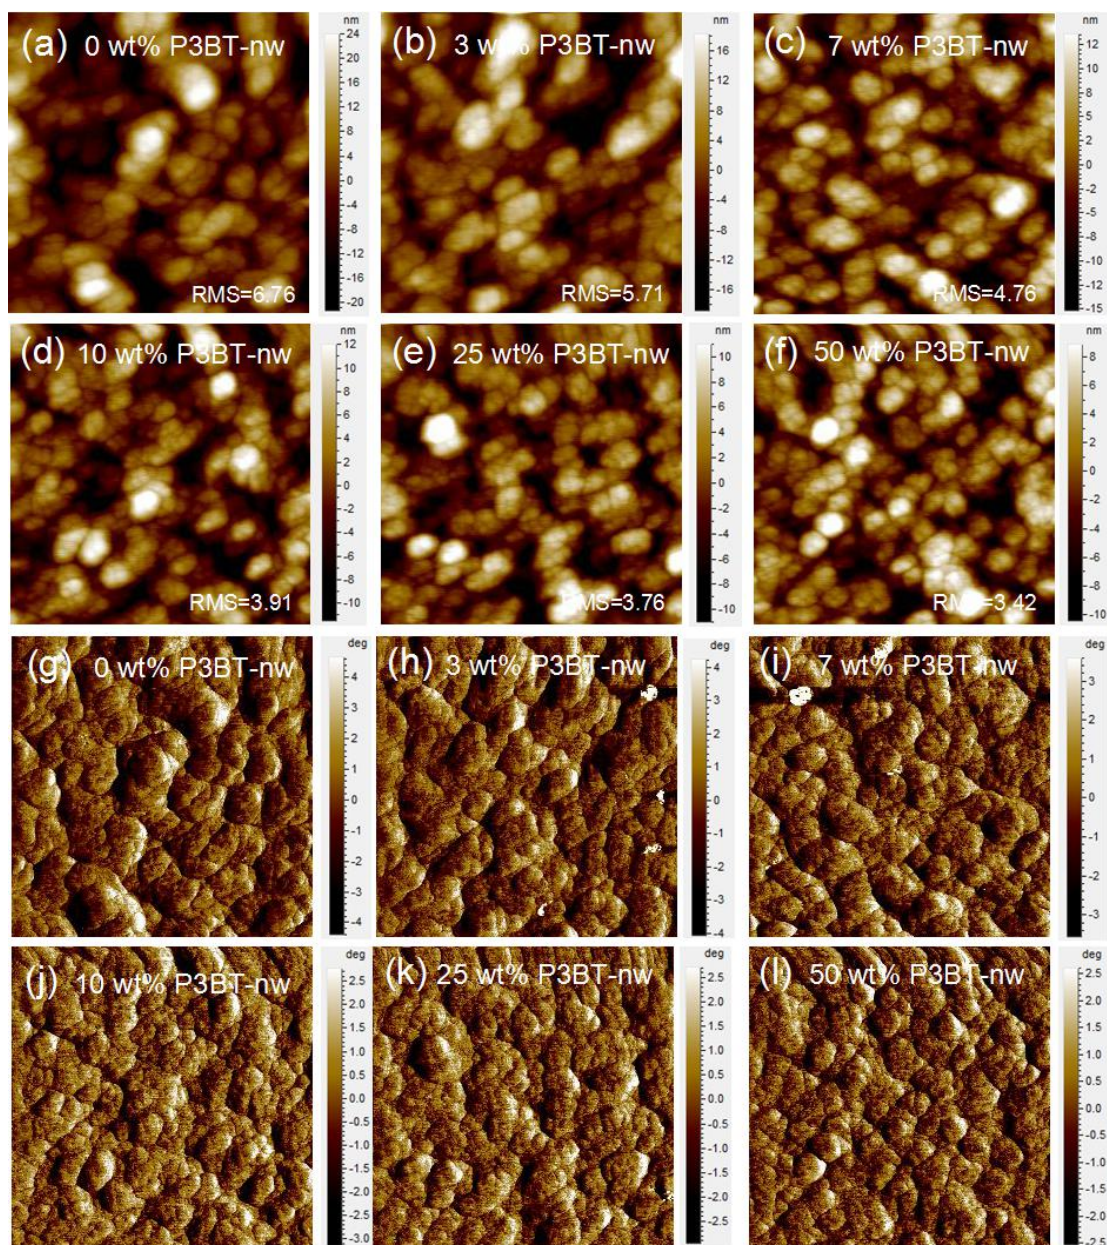

**Figure S6.** AFM topography images ( $5 \times 5 \mu\text{m}$ ) and phase images of P3HT:PCBM films with various weight percentage of P3BT-nw (a, g) 0 wt%, (b, h) 3 wt%, (c, i) 7 wt%), (d, j) 10 wt%, (e, k) 25 wt%, (f, l) 50 wt%, respectively.

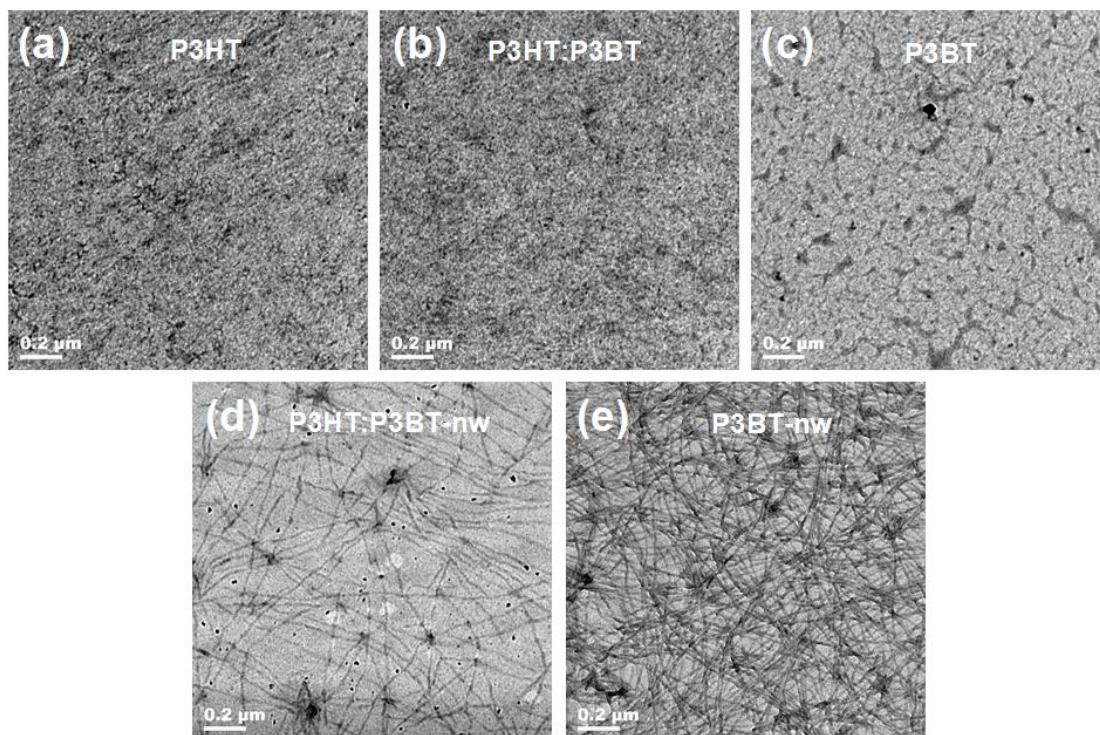

**Figure S7.** TEM images of pristine (a) P3HT, (b) P3HT:P3BT blend containing 7 wt% P3BT, (c) P3BT, (d) P3HT:P3BT-nw blend containing 7 wt% P3BT-nw and (e) P3BT-nw films.
